# Supplementary material for: Defense of Scots pine against sawfly eggs (Diprion pini) is primed by exposure to sawfly sex pheromones
Source: PubMed Central journal article supplement — Proc Natl Acad Sci U S A. 2019 Nov 20;116(49):24668–75. doi: 10.1073/pnas.1910991116 (PMC6900732; doi:10.1073/pnas.1910991116), 2019-11-20
Supplement: pnas.1910991116.sapp.pdf [file pnas.1910991116.sapp.pdf]

# Supplementary Information

## Defense of Scots pine against sawfly eggs (*Diprion pini*) is primed by exposure to sawfly sex pheromones

Norbert Bittner<sup>a</sup>, Janik Hundacker<sup>a</sup>, Ander Achotegui-Castells<sup>b,c</sup>, Olle Anderbrant<sup>d</sup> and Monika Hilker<sup>a,1</sup>

<sup>a</sup>Freie Universität Berlin, Dahlem Centre of Plant Sciences, Institute of Biology, Haderslebener Str. 9, 12163 Berlin, Germany

<sup>b</sup>Centre de Recerca Ecològica i Aplicacions Forestals (CREAF), Cerdanyola del Valles, Barcelona, 08193, Catalonia, Spain

<sup>c</sup>Global Ecology Unit, CREAF-Consejo Superior de Investigaciones Científicas, Universitat Autònoma de Barcelona, Bellaterra, Barcelona, 08193, Catalonia, Spain

<sup>d</sup>Lund University, Department of Biology, Sölvegatan 37, 223 62 Lund, Sweden

<sup>1</sup> Email: [monika.hilker@fu-berlin.de](mailto:monika.hilker@fu-berlin.de)

### This PDF file includes:

- Supplementary Material and Methods
- Supplementary Table S1 to S8
- Supplementary Fig. S1
- Supplementary References

## 34 **Supplementary Material and Methods**

35

36 **Pine exposure to pheromones for 24 h.** Male and female *D. pini* adults are spending their lives in the  
37 pine trees. Since no distinct mate calling behavior has been observed in *D. pini* females, no  
38 information is available on their active pheromone release. Interestingly, pheromonal components  
39 have also been detected in extracts of *D. pini* cuticle (1), suggesting some continuous, passive  
40 pheromone release. Regardless of the exposure to pheromones released from *D. pini* females sitting  
41 in a tree, the tree might also perceive pheromones *via* (gusts of) wind transferring diprionid  
42 pheromones over some distance, as indicated by studies showing that attraction of diprionids to  
43 traps baited with female sex pheromones are affected by wind conditions (2). Thus, depending on  
44 the distance of a tree from a pheromone source and on the speed of wind carrying a pheromone  
45 plume to a tree in a pine forest subjected to a mass outbreak of *D. pini*, an individual pine tree might  
46 be exposed to diprionid pheromones at any daytime. During a mass outbreak of *D. pini* with  
47 successive emergence of adults, high concentrations of pheromones might be around even for longer  
48 than 24 h.

49

50 **Determination of pheromone release rate.** To calculate the release rate of *D. pini* pheromones from  
51 cotton pads placed into the cylinders with the pine trees, we determined the initial quantity of  
52 pheromones applied to the pads and the remaining pheromone quantity after a 24 h exposure to  
53 pine trees. The pheromones were supplied by Olle Anderbrant from Lund University in Sweden; they  
54 were synthesized by Helen Edlund and Erik Hedenström at Mid Sweden University, with a GC purity  
55 of 99%.

56 More specifically, we applied 100  $\mu\text{l}$  of a pheromone solution in hexane (50  $\text{ng } \mu\text{l}^{-1}$  mixture of each of  
57 the pheromone esters (2*S*,3*R*,7*R*)-3,7-dimethyl-2-tridecanyl acetate and propionate) to a cotton pad  
58 (as described in the main text). After pheromone application, the pads were placed for 30 min in a  
59 fume hood, thus allowing the hexane to evaporate. Thereafter, we extracted the pheromone with  
60 hexane from the dispenser cotton pads ( $n = 5$ ). Analysis of the extracts by GC-MS (conditions as  
61 described in the main text, Material and Methods) provided data on the initial amount of pheromone  
62 per pad (and tree). After being used in the experiments (i.e. after the 24 h treatment of plants), we  
63 also extracted the cotton pads and analyzed the quantity of pheromone remaining on them ( $n = 48$ ).  
64 Based on our data and assuming a continuous release rate, we calculated the proportion of the  
65 pheromone released and the release rate in  $\text{ng h}^{-1}$  (*SI Appendix*, Table S1). Approximately half of the  
66 propionate of (2*S*,3*R*,7*R*)-3,7-dimethyl-2-tridecanol, and two-thirds of the acetate were released  
67 during the 24 h incubation period.

68 The amounts of pheromone components per *D. pini* female were found to vary within a wide range  
 69 (1). Small amounts of the acetate and propionate component were detected in a similar ratio, but  
 70 the maximum amount of the acetate component detected in a female was 1000 pg, and of the  
 71 propionate component 500 pg (1). Hence, the ratio of the two pheromone components may range  
 72 from about 1:1 to 2:1. When comparing the release rate determined here in our study (see Table S1)  
 73 with that of the maximum amount of pheromonal compounds determined by Anderbrant *et al.* per  
 74 *D. pini* female (1), the quantity of pheromones released from a cotton pad in our study was  
 75 equivalent to the possible emission by 270 to 450 females. This number of females is very similar to  
 76 the numbers per tree that were previously observed during mass outbreaks of *D. pini* by us and  
 77 others (3).

78 **Pheromone residues on plants.** To examine whether residues of the pheromone were left on pine  
 79 needles, pine was exposed to both pheromone esters for 24 h following the method described in the  
 80 main text. After exposure to the pheromones, pine was exposed to clean, charcoal-filtered air for  
 81 additional 6 h. We exposed three *P. sylvestris* trees to the pheromones and harvested 1g needles of  
 82 each tree. The three needle samples were extracted each with 1 ml hexane. The extracts were  
 83 analyzed (i) directly and (ii) after concentration to 50 µl under N<sub>2</sub>. A volume of 1 µl of the extracts  
 84 was injected into a GC-MS (Agilent 7890 A GC model coupled to an Agilent 5975 C MS unit) in  
 85 splitless mode (injector temperature 250 °C; Zebron ZB-5HT capillary column; 30 m x 0.25 mm i.d.;  
 86 film thickness: 0.25 µm). Helium was used as carrier gas with a flow rate of 1 ml min<sup>-1</sup>. The following  
 87 program was used for analysis: 4 min hold at 40 °C, ramp of 10 °C min<sup>-1</sup> to 180 °C, followed by a ramp  
 88 of 20 °C min<sup>-1</sup> to 280 °C and a 5 min hold of 280 °C. A solvent delay of 4 min was added. The column  
 89 effluent was exposed to electron impact ionization at 70 eV. We recorded a total ion current  
 90 chromatogram (TIC) with a mass range of 25 to 300 m/z and additionally analyzed samples in the  
 91 single ion mode (SIM) in search for characteristic ions of the pheromone esters: 87 m/z, 101 m/z, 210  
 92 m/z.

93 No (traces of) pheromone esters were detected in neither type of extract.

94

95 **Supplementary Table S1. Determination of release rate of *Diprion pini* sex pheromones from**  
 96 **cotton pads used in the experiments.** Emission rate and percentage of emitted total proportion of  
 97 the acetate and propionate esters of *D. pini* sex pheromone ((2*S*,3*R*,7*R*)-3,7-dimethyl 2-tridecanyl  
 98 acetate and propionate) are given (means ± SE).

| Pheromone ester | Emission rate in ng h <sup>-1</sup> | Percentage emitted during 24 h |
|-----------------|-------------------------------------|--------------------------------|
| Acetate         | 270±16.3                            | 64.7±3.9                       |
| Propionate      | 225±16.6                            | 53.9±4.0                       |

99

100

101 **Supplementary Table S2. Details of evaluations by ANOVA.** For data on egg survival and number of  
 102 eggs laid: please compare Fig. 1, main text. For measurements of water content and H<sub>2</sub>O<sub>2</sub>  
 103 concentrations, which were conducted 2 and 12 days after pheromone exposure (i.e. 1 or 11 days  
 104 after egg deposition): please compare Fig. 2, main text and Fig. S1, *SI Appendix*.

| Analysis                                    | Degrees of Freedom <sup>*</sup> | Sum of Squares <sup>*</sup> | Mean Square <sup>*</sup> | F value | P value |
|---------------------------------------------|---------------------------------|-----------------------------|--------------------------|---------|---------|
| Egg survival                                | 2 / 19                          | 2015.47 / 4679.54           | 1007.74 / 246.29         | 4.092   | = 0.033 |
| Number of eggs laid                         | 2 / 19                          | 8977.36 / 28112.50          | 4488.68 / 1479.61        | 3.034   | = 0.072 |
| Water content, day 2                        | 4 / 32                          | 29.07 / 87.71               | 7.27 / 2.92              | 2.486   | = 0.065 |
| Water content, day 12                       | 4 / 32                          | 210.60 / 661.60             | 52.65 / 20.68            | 2.547   | = 0.058 |
| H <sub>2</sub> O <sub>2</sub> conc., day 2  | 4 / 35                          | 158.18 / 1159.24            | 39.54 / 33.12            | 1.194   | = 0.331 |
| H <sub>2</sub> O <sub>2</sub> conc., day 12 | 4 / 35                          | 544.93 / 90.12              | 136.23 / 2.58            | 52.911  | < 0.001 |

105 <sup>\*</sup> Source of variation: between groups / within groups

106

107

108

109 **Supplementary Table S3. Details of paired t-test evaluations of comparison of numbers of laid eggs**  
 110 **with numbers of hatched eggs per treatment.** Compare Fig. 1, main text.

| Treatment | Degrees of Freedom | t value | P value |
|-----------|--------------------|---------|---------|
| Untreated | 5                  | 4.584   | = 0.006 |
| Hexane    | 7                  | 6.200   | < 0.001 |
| Pheromone | 7                  | 8.233   | < 0.001 |

111

112 **Supplementary Table S4. Details of statistical evaluations of differences in gene expression by**  
 113 **Kruskal-Wallis H test.** Compare Table 1, main text.

| Gene                                                   | Day <sup>*</sup> | Degrees of Freedom | H value | P value |
|--------------------------------------------------------|------------------|--------------------|---------|---------|
| <b>ROS mediating genes</b>                             |                  |                    |         |         |
| <i>PsRboh</i>                                          | 2                | 3                  | 15.763  | 0.001   |
| <i>PsRboh</i>                                          | 12               | 3                  | 9.568   | 0.023   |
| <i>PsSOD</i>                                           | 2                | 3                  | 4.071   | 0.254   |
| <i>PsSOD</i>                                           | 12               | 3                  | 7.937   | 0.026   |
| <i>PsCAT</i>                                           | 2                | 3                  | 7.910   | 0.048   |
| <i>PsCAT</i>                                           | 12               | 3                  | 2.895   | 0.423   |
| <i>PsAPX</i>                                           | 2                | 3                  | 5.993   | 0.112   |
| <i>PsAPX</i>                                           | 12               | 3                  | 9.260   | 0.026   |
| <b>Genes involved in SA- and JA-mediated responses</b> |                  |                    |         |         |
| <i>PsLOX</i>                                           | 2                | 3                  | 4.588   | 0.205   |
| <i>PsLOX</i>                                           | 12               | 3                  | 10.513  | 0.015   |
| <i>PsPDF</i>                                           | 2                | 3                  | 2.065   | 0.559   |
| <i>PsPDF</i>                                           | 12               | 3                  | 1.215   | 0.729   |
| <i>PsPR-1</i>                                          | 2                | 3                  | 3.048   | 0.384   |
| <i>PsPR-1</i>                                          | 12               | 3                  | 16.682  | 0.001   |
| <i>PsPAL</i>                                           | 2                | 3                  | 1.622   | 0.654   |
| <i>PsPAL</i>                                           | 12               | 3                  | 10.177  | 0.017   |

114 <sup>\*</sup> days after pheromone exposure

115

**Supplementary Table S5. Sequences of primers used in this study for qPCR and related search information.** Compare Table 1, main text.

| Gene                                                   | Primer sequence (5' -> 3') | Pine template for primer design | Species for primer design | Species for BLAST search for pine primer template design |
|--------------------------------------------------------|----------------------------|---------------------------------|---------------------------|----------------------------------------------------------|
| <b>Housekeeping genes</b>                              |                            |                                 |                           |                                                          |
| <i>PsUBIF</i>                                          | ACTTTACCAGAGTCATCAACC      | HE629096                        | <i>Pinus sylvestris</i>   | <i>Picea abies</i> (EF681766)                            |
| <i>PsUBIR</i>                                          | GGTTCTTCGTCTGAGAGGTG       |                                 |                           |                                                          |
| <i>PscATPF</i>                                         | GGGTCCGTC AAGTCGTCAGC      | GW765967                        | <i>Pinus banksiana</i>    | <i>Ginkgo biloba</i> (EU071049)                          |
| <i>PscATPR</i>                                         | GCACGGAAATGGGTTCTTTGC      |                                 |                           |                                                          |
| <i>PsPETBF</i>                                         | ACCATCATACTTGCCGACCATC     | CV035597                        | <i>Pinus taeda</i>        | <i>Populus euphratica</i> (XM011050173)                  |
| <i>PsPETBR</i>                                         | TCGTCCGACCGTTACAGAAGC      |                                 |                           |                                                          |
| <b>ROS-mediating genes</b>                             |                            |                                 |                           |                                                          |
| <i>PsRbohF</i>                                         | GATGTACCTGGCAGTTCC         | MF389973                        | <i>Pinus sylvestris</i>   | <i>Picea abies</i> (KT192592)                            |
| <i>PsRbohR</i>                                         | GCCACTCTGTATCTGAACC        |                                 |                           |                                                          |
| <i>PsSODF</i>                                          | GCTGATGTCAAGGGGGTTGT       | X58578                          | <i>Pinus sylvestris</i>   | -                                                        |
| <i>PsSODR</i>                                          | ACCATGCTCCTGCCTAACG        |                                 |                           |                                                          |
| <i>PsCATF</i>                                          | AAGGGCTTTTTCGAGGTGAC       | AL751103                        | <i>Pinus pinaster</i>     | -                                                        |
| <i>PsCATR</i>                                          | GGAATTACCTGCATGGCATC       |                                 |                           |                                                          |
| <i>PsAPXF</i>                                          | TCTGGTTTTGAAGGACCATG       | AY485994                        | <i>Pinus pinaster</i>     | -                                                        |
| <i>PsAPXR</i>                                          | AAACTAGGATCAGCCAGCAG       |                                 |                           |                                                          |
| <b>Genes involved in SA- and JA-mediated responses</b> |                            |                                 |                           |                                                          |
| <i>PsLOXF</i>                                          | TGGACTAATGATGGAAGAGCAC     | DR169048                        | <i>Pinus taeda</i>        | <i>Picea sitchensis</i> (CO218750)                       |
| <i>PsLOXR</i>                                          | TGATGTTGGCAGCAATAACTCG     |                                 |                           |                                                          |
| <i>PsPDFF</i>                                          | GGCAAGGGAGTTGGCAGTCG       | EF455616                        | <i>Pinus sylvestris</i>   | -                                                        |
| <i>PsPDFR</i>                                          | TGGTGCTGTTACACAATACCC      |                                 |                           |                                                          |
| <i>PsPR-1F</i>                                         | TCGTCAACGTACACAGATGTTG     | HE627106                        | <i>Pinus sylvestris</i>   | <i>Arabidopsis thaliana</i> (NM127025)                   |
| <i>PsPR-1R</i>                                         | ACTACGATCCGCCTGGGAAC       |                                 |                           |                                                          |
| <i>PsPALF</i>                                          | CTGGCAGCGATCCACTGAAC       | AF353967                        | <i>Pinus sylvestris</i>   | -                                                        |
| <i>PsPALR</i>                                          | CTTCGAGCAACGGCAGCAAC       |                                 |                           |                                                          |

**Supplementary Table S6. Nucleotide sequences of PCR products obtained from primers used in this study** (if based on published sequences, the references are given here in the *SI Appendix*, section “References”). Compare Table 1, main text.

| Name                                                   | Nucleotide sequence 5'-3'                                                                                                                                                                                                                                                                                         |
|--------------------------------------------------------|-------------------------------------------------------------------------------------------------------------------------------------------------------------------------------------------------------------------------------------------------------------------------------------------------------------------|
| <b>Housekeeping genes</b>                              |                                                                                                                                                                                                                                                                                                                   |
| <i>PsUBI</i>                                           | ACTTTACCAGAGTCATCAACCTTGTAGTACTGCAGAACAGCCAATTTTACCTTCTTCTTCTGT<br>GCTTGAGCTTCTTAGGCTTAGTGTAAGTCTTCTTCTTCTTCTTCTTGGCACCACCTCTCAGACG<br>AAGAACCAA                                                                                                                                                                  |
| <i>PscATP</i>                                          | GGGTCAAGTCGTGAGCAGGTACATAAACTGCTTGAATCGAGGTTATGGATCCCTTTTTTGTGG<br>AGTAATTCTCGTGCCTTTACCCAAGAAACGTT                                                                                                                                                                                                               |
| <i>PsPETB</i>                                          | ACCATCGATGAATTGATCGGATTAACCAACCAAAGTAACTTCGGTCATTAGGTATTGAACAG<br>AGGCAAAGCTTCTGTAACGGTCGGACGA                                                                                                                                                                                                                    |
| <b>ROS-mediating genes</b>                             |                                                                                                                                                                                                                                                                                                                   |
| <i>PsRboh</i>                                          | GATGTACCTGGCAGTCCCCTATTATTATATGGAGGAGAACGAACACTGAGAGCTTTTCAG<br>ATCAGGTTCAAACCCGTGCAAATACTCAAGGTTTGTCTTTACATCAATTTTCATTTTT<br>GTGATTCTAGCTTTGCATCTGCAATCCTTGATGTGACCAATAGAATCTGTTGCATTTTTG<br>GGGGATTTTGCTCTAACATCTACACGGTCCACATTTGCAGGTAGCAATCTATCCTGGTA<br>ATGCTTGTACATTTACATGTCCAAACCTCAAGGGTTCAGATACAAGAGTGGC |
| <i>PsSOD</i> (4)                                       | GCTGATGTCAAGGGGTTGTTCAATTCACCCAGGAAGGAGATGGGCCAACAACACTGTAAC<br>GGGAAGATCAGTGGTCTGAGCCCTGGTCTCCATGGTTTCCATGTTTCATGCACTAGGTGAC<br>ACAACAAATGGGTGCATGTCAACTGGACCACATTTAATCCGTTAGGCAAGGAGCATGGT                                                                                                                      |
| <i>PsCAT</i> (5)                                       | TAAGGGCTTTTTCGAGGTGACCCACTATGTCTCCGATCTCACCTGTGCAGATTTTCATGAG<br>GGCACCTGGCGTTCAGACCCAGTGATTGTTTCGGTTTTCTACTGTCATACATGAACGTGG<br>GAGCCCGGAGACTATGAGAGACCCAGGGTTTTCGCTGTCAAGTTTTACACGAGAGAAGG<br>GAACTTCGACATTGTTGGAACAATATCCCGTTTTCTCACTCGTGATGCCATGCAGGT<br>AATTCC                                               |
| <i>PsAPX</i> (6)                                       | TCTGGTTTTGAAGGACCATGGACCTCTAACCTCTTATCTTTGACAACCTTACTTTCACA<br>GAGCTTGTGACTGGAGAGAAGGAAGCCTGCTTCAGCTGCCATCTGATAAGGCACTGCTG<br>GCTGATCCTAGTTTA                                                                                                                                                                     |
| <b>Genes involved in SA- and JA-mediated responses</b> |                                                                                                                                                                                                                                                                                                                   |
| <i>PsLOX</i>                                           | TGGACTAATGATGGAAGAGCACTGGAGGCCTTTCAAAGGTTTTCTACCACAGTTCAGGGGGT<br>AGAGGAAATCATACATCAGAGAAATGAAGATTCGAGTAAGAAGAACAGGAATGGGGCSGG<br>CGTACTTCTTACGAGTTATTGCTGCCAACATCAACC                                                                                                                                            |
| <i>PsPDF</i>                                           | GGCAAGGGAGTTGGCAGTCGACTCAGCACTTTTTCTGCTCGTGCTGCTTGTATAACC<br>ATTGGGATGATGCAGGTTCAAGTTCAGAGGGCCGAATGTGCAAACCCCGAGCGGCAAG<br>TTCAAAGGGTATTGTGTGAACAGCACCA                                                                                                                                                           |
| <i>PsPAL</i> (7)                                       | CTGGCAGCGATCCACTGAACTGGGTTTCGAGCAGCCAAGGCCATGGAAGGAAGTCACTTTG<br>AAGAAGTGAAAGCGATGGTGGATTTCGATTTGGGAGTCAAGGAGATTTTCATTGAAGGGA<br>AATCTCTGACAATCTCAGACGTTGCTGCCGTTGCTCGAAG                                                                                                                                         |
| <i>PsPR-1</i>                                          | TCGTCAACGTACACAGATGTTGAAGATTTACAGTAACACGGAATATTAGAAGGAAATTAACG<br>AAAATAATACGATATGATAGGTCCGGATATCAGAATTCAGTATGGTTTCTGCCCTACATAGT<br>TCCAGGCGGATCGTAGT                                                                                                                                                             |

**Supplementary Table S7. Transcript levels of genes in untreated pine trees and in trees exposed to hexane.** Gene expression in untreated trees was normalized to the expression of the housekeeping genes (see main text, Material and Methods) and set to value 1. Gene expression in hexane-treated trees expressed as fold-change to expression levels in untreated controls. Data show means  $\pm$  SE.  $n = 8$  untreated and  $n = 5-8$  hexane-treated trees. Expression levels were determined 2 and 12 days after treatment.  $P$  values: pairwise comparison of untreated and “hexane control” by \* $t$ -test or †Mann-Whitney  $U$  test. Compare Table 1, main text.

| Time                                                                           | Hexane control  | Untreated       | $P$ value |
|--------------------------------------------------------------------------------|-----------------|-----------------|-----------|
| <b><i>PsRboh</i> - Respiratory burst oxidase homolog (plant NADPH oxidase)</b> |                 |                 |           |
| 2d*                                                                            | 0.76 $\pm$ 0.09 | 1.00 $\pm$ 0.20 | 0.311     |
| 12d†                                                                           | 2.06 $\pm$ 0.28 | 1.00 $\pm$ 0.16 | 0.126     |
| <b><i>PsSOD</i> - Superoxide dismutase</b>                                     |                 |                 |           |
| 2d*                                                                            | 1.21 $\pm$ 0.24 | 1.00 $\pm$ 0.17 | 0.498     |
| 12d*                                                                           | 1.46 $\pm$ 0.15 | 1.00 $\pm$ 0.13 | 0.720     |
| <b><i>PsCAT</i> – Catalase</b>                                                 |                 |                 |           |
| 2d†                                                                            | 0.56 $\pm$ 0.13 | 1.00 $\pm$ 0.25 | 0.222     |
| 12d†                                                                           | 0.56 $\pm$ 0.10 | 1.00 $\pm$ 0.21 | 0.228     |
| <b><i>PsAPX</i> - Ascorbate peroxidase</b>                                     |                 |                 |           |
| 2d*                                                                            | 0.98 $\pm$ 0.10 | 1.00 $\pm$ 0.20 | 0.924     |
| 12d†                                                                           | 1.44 $\pm$ 0.24 | 1.00 $\pm$ 0.07 | 0.081     |
| <b><i>PsLOX</i> - Lipoxygenase</b>                                             |                 |                 |           |
| 2d†                                                                            | 1.59 $\pm$ 0.46 | 1.00 $\pm$ 0.17 | 0.442     |
| 12d*                                                                           | 0.68 $\pm$ 0.12 | 1.00 $\pm$ 0.09 | 0.055     |
| <b><i>PsPDF</i> - Plant defensin</b>                                           |                 |                 |           |
| 2d†                                                                            | 1.27 $\pm$ 0.54 | 1.00 $\pm$ 0.34 | 0.878     |
| 12d*                                                                           | 0.55 $\pm$ 0.15 | 1.00 $\pm$ 0.22 | 0.128     |
| <b><i>PsPR-1</i> - Pathogenesis related 1</b>                                  |                 |                 |           |
| 2d†                                                                            | 4.11 $\pm$ 2.36 | 1.00 $\pm$ 0.48 | 0.442     |
| 12d*                                                                           | 0.56 $\pm$ 0.16 | 1.00 $\pm$ 0.41 | 0.382     |
| <b><i>PsPAL</i> - Phenylalanine ammonia lyase</b>                              |                 |                 |           |
| 2d*                                                                            | 1.48 $\pm$ 0.44 | 1.00 $\pm$ 0.18 | 0.335     |
| 12d*                                                                           | 0.75 $\pm$ 0.17 | 1.00 $\pm$ 0.16 | 0.294     |

**Supplementary Table S8. Details of statistical evaluations of the EAG responses by *Diprion pini* to the acetate / propionate sex pheromonal components.** Responses to test substance compared to responses to controls; Wilcoxon matched pairs test. Compare Fig. 3, main text.

| Test substance                            | Sex    | Z value | $P$ value |
|-------------------------------------------|--------|---------|-----------|
| Acetate pheromone component               | male   | 2.521   | 0.008     |
| Propionate pheromone component            | male   | 2.521   | 0.008     |
| Acetate + Propionate pheromone components | male   | 2.521   | 0.008     |
| Acetate pheromone component               | female | 0.840   | 0.461     |
| Propionate pheromone component            | female | 1.540   | 0.148     |
| Acetate + Propionate pheromone components | female | 1.183   | 0.297     |

**Supplementary Fig. S1.** (A) Water contents and (B) hydrogen peroxide concentrations of *Pinus sylvestris* after exposure to sawfly sex pheromones and subsequent egg deposition. Measurements were conducted 2 days after pheromone exposure, i.e. 1 day after egg deposition, and at equivalent time points in controls. Water concentrations and hydrogen peroxide concentrations were determined in pine needles from untreated trees, from trees exposed to the solvent hexane (without eggs: hexane control; with eggs: hexane + eggs), from trees exposed to the pheromones (dissolved in hexane) (without eggs: pheromone; with eggs: pheromone + eggs). Means + SE of water contents and hydrogen peroxide concentrations are given ( $n = 5$  for water content untreated;  $n = 8$  for all other treatments). All data evaluated by ANOVA (n.s., not significant) (compare *SI Appendix*, Table S2).

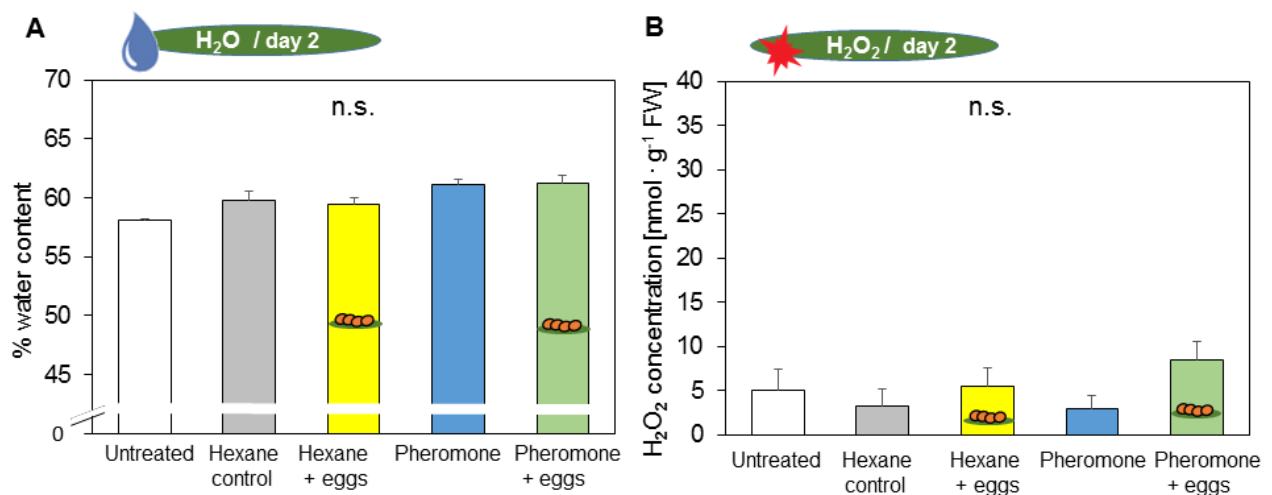

## Supplementary References

1. O. Anderbrant *et al.*, Release of sex pheromone and its precursors in the pine sawfly *Diprion pini* (Hym., Diprionidae). *Chemoecology* **15**, 147–151 (2005).
2. R. Wedding, O. Anderbrant, P. Jönsson, Influence of wind conditions and intertrap spacing on pheromone trap catches of male European pine sawfly, *Neodiprion sertifer*. *Entomol. Exp. Appl.* **77**, 223–232 (1995).
3. W. Thalenhorst, Der Zusammenbruch einer Massenvermehrung von *Diprion pini* L. und seine Ursachen. *Z. Angew. Entomol.* **29**, 367–411 (1942).
4. B. Karpinska *et al.*, A novel superoxide dismutase with a high isoelectric point in higher plants. Expression, regulation, and protein localization. *Plant Physiol.* **126**, 1668–1677 (2001).
5. B. Vornam, A. Arkhipov, R. Finkeldey, Nucleotide diversity and gene expression of catalase and glutathione peroxidase in irradiated Scots pine (*Pinus sylvestris* L.) from the Chernobyl exclusion zone. *J. Environ. Radioact.* **106**, 20–26 (2012).
6. L. Valledor, M. J. Cañal, J. Pascual, R. Rodríguez, M. Meijón, Early induced protein 1 (PrELIP1) and other photosynthetic, stress and epigenetic regulation genes are involved in *Pinus radiata* D. don UV-B radiation response. *Physiol. Plant.* **146**, 308–320 (2012).
7. V. Dvornyk, A. Sirviö, M. Mikkonen, O. Savolainen, Low nucleotide diversity at the *pal1* locus in the widely distributed *Pinus sylvestris*. *Mol. Biol. Evol.* **19**, 179–188 (2002).
